# Supplementary material for: Crafting NPB with tetraphenylethene: a win–win strategy to create stable and efficient solid-state emitters with aggregation-induced emission feature, high hole-transporting property and efficient electroluminescence
Source: Royal Society of Chemistry journal article supplement (doi:10.1039/c4tc00145a), 2014-01-01
Supplement: c4tc00145a1.pdf [file c4tc00145a1.pdf]

*Electronic Supplementary Information (ESI)*

**Crafting NPB with tetraphenylethene: a win-win  
strategy to create stable and efficient solid-state  
emitter with aggregation-induced emission feature,  
high hole-transporting property and efficient  
electroluminescence**

Wei Qin,<sup>ab</sup> Jianzhao Liu,<sup>ab</sup> Shuming Chen,<sup>c</sup> Jacky W. Y. Lam,<sup>ab</sup> Mathieu Arseneault,<sup>ab</sup>  
Zhiyong Yang,<sup>ab</sup> Qiuli Zhao,<sup>d</sup> Hoi Sing Kwok,<sup>c</sup> and Ben Zhong Tang<sup>\*abe</sup>

<sup>a</sup> HKUST-Shenzhen Research Institute, No. 9 Yuexing 1st RD, South Area, Hi-tech Park, Nanshan, Shenzhen, 518057, China. E-mail: tangbenz@ust.hk

<sup>b</sup> Department of Chemistry, Institute for Advanced Study, Institute of Molecular Functional Materials and Division of Biomedical Engineering, The Hong Kong University of Science & Technology (HKUST), Clear Water Bay, Kowloon, Hong Kong, China

<sup>c</sup> Center for Display Research, HKUST, Clear Water Bay, Kowloon, Hong Kong, China

<sup>d</sup> Department of Polymer Science and Engineering, Zhejiang University, Hangzhou 310027, China

<sup>e</sup> Guangdong Innovative Research Team, SCUT-HKUST Joint Research Laboratory, State Key Laboratory of Luminescent Materials and Device, South China University of Technology (SCUT), Guangzhou, 51640, China

## Table of Contents

**Figure S1.**  $^1\text{H}$  NMR spectrum of TPE-NPB in chloroform-*d*.

**Figure S2.** High resolution mass spectrum of TPE-NPB.

**Figure S3.** TGA thermogram of NPB recorded under nitrogen at a heating rate of 10  $^{\circ}\text{C}/\text{min}$ .

**Figure S4.** Cyclic voltammogram of TPE-NPB measured in dichloromethane containing 0.1 M tetra-*n*-butylammonium hexafluorophosphate. Scan rate = 100 mV/s.

**Figure S5.** Changes in current and luminance with the applied voltage in a single-layer EL device of TPE-NPB with a configuration of ITO/TPE-NPB/LiF/Al. Inset: EL spectrum of the device.

**Table S1.** Summary of angles in TPE-NPB.

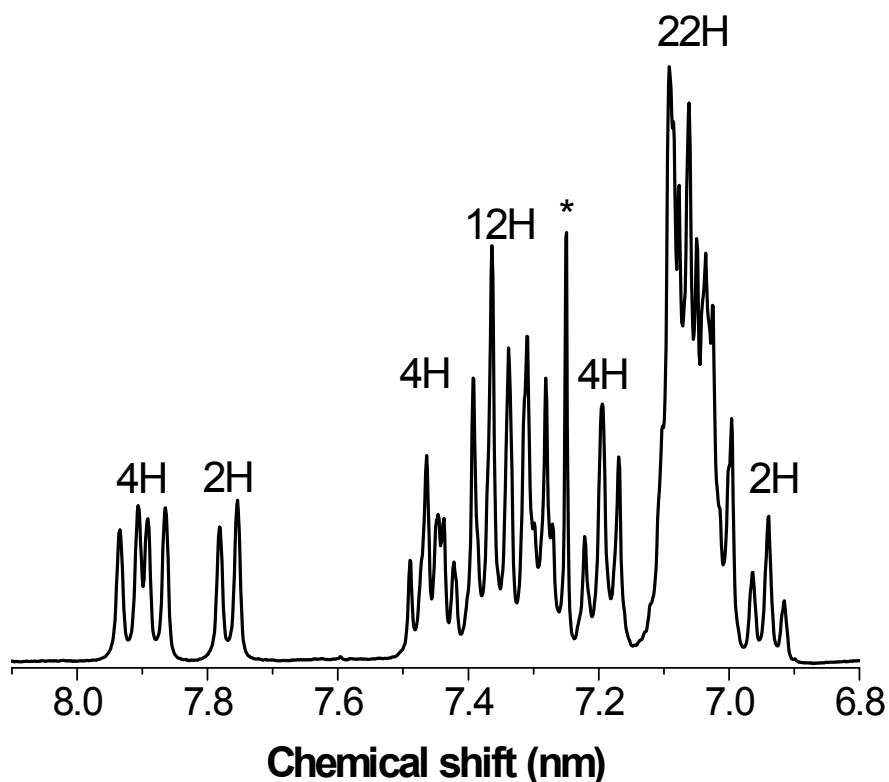

**Figure S1.**  $^1\text{H}$  NMR spectrum of TPE-NPB in chloroform-*d*.

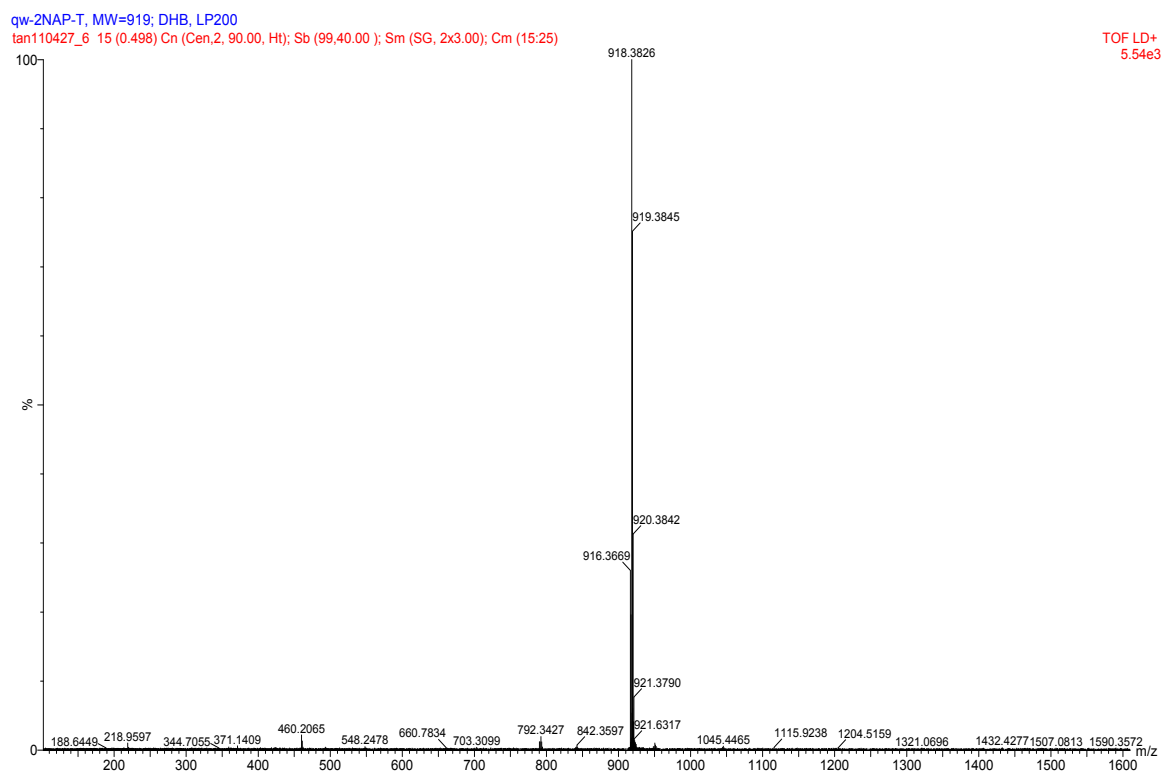

**Figure S2.** High resolution mass spectrum of TPE-NPB.

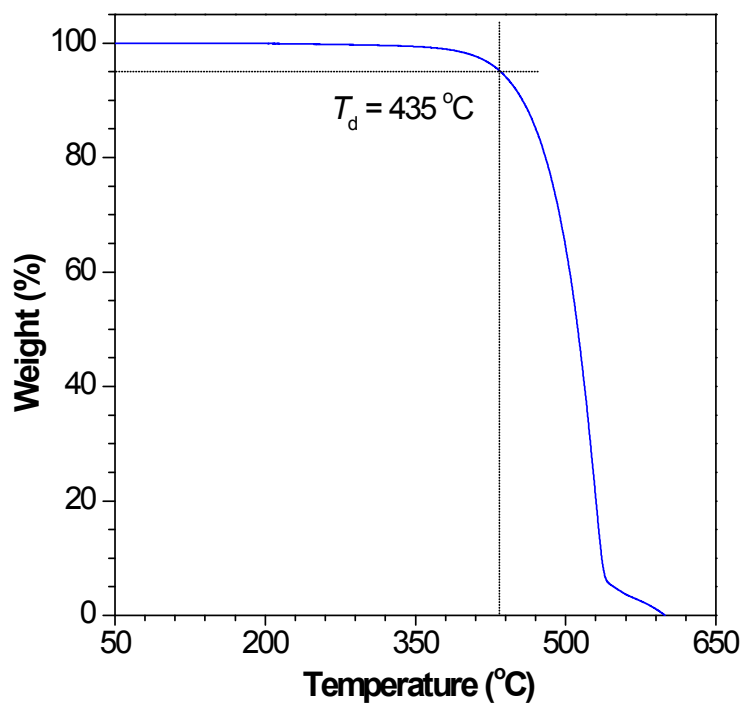

**Figure S3.** TGA thermogram of NPB recorded under nitrogen at a heating rate of 10 °C/min.

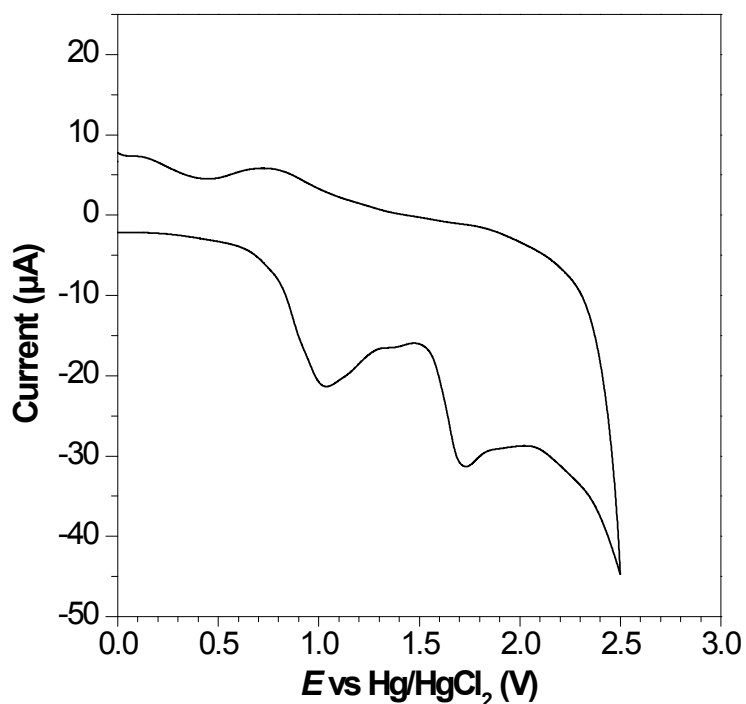

**Figure S4.** Cyclic voltammograms of TPE-NPB measured in dichloromethane containing 0.1 M tetra-*n*-butylammonium hexafluorophosphate. Scan rate = 100 mV/s.

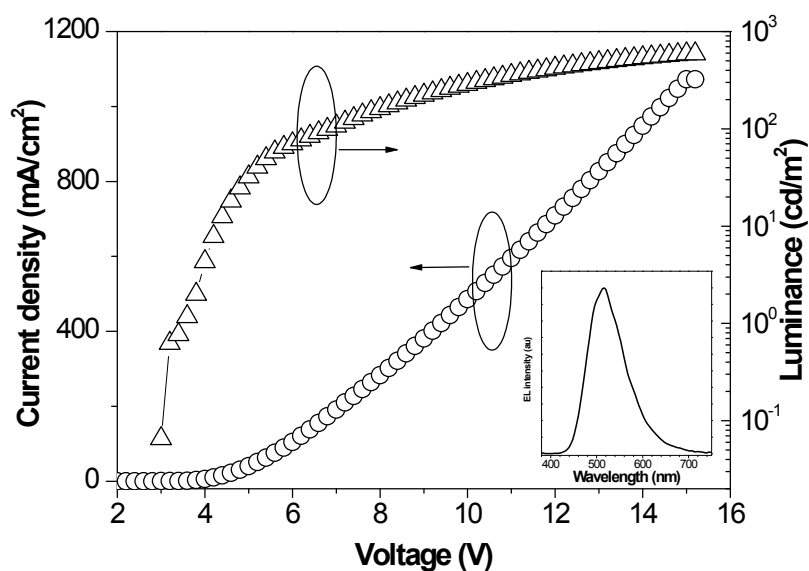

**Figure S5.** Changes in current and luminance with the applied voltage in a single-layer EL device of TPE-NPB with a configuration of ITO/TPE-NPB/LiF/Al. Inset: EL spectrum of the device.

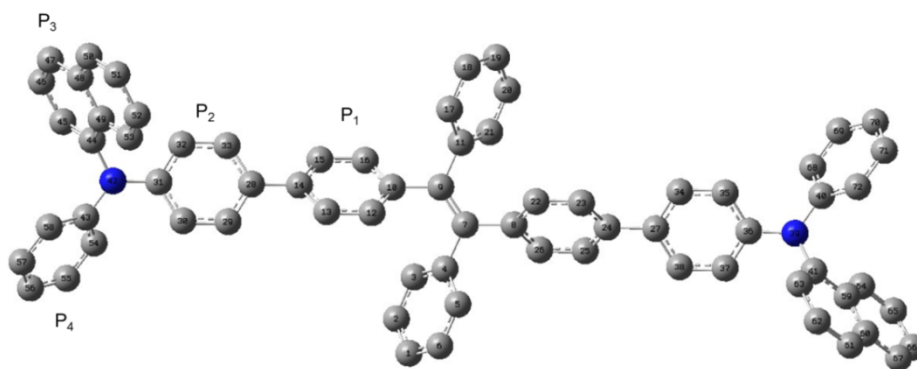

Table S1. Summary of angles for TPE-NPB

|                                | Torsion angles (°) |
|--------------------------------|--------------------|
| C3-C4-C7-C9                    | 50.1               |
| C12-C10-C9-C7                  | 48.2               |
| C21-C11-C9-C7                  | 50.2               |
| C22-C8-C7-C9                   | 48.1               |
| Angles between planes (°)      |                    |
| P <sub>1</sub> -P <sub>2</sub> | ~34                |
| P <sub>2</sub> -P <sub>3</sub> | ~79                |
| P <sub>2</sub> -P <sub>4</sub> | ~63                |
| P <sub>3</sub> -P <sub>4</sub> | ~83                |
